# Supplementary material
Source: ML conference proceedings conference paper supplement (https://openreview.net/forum?id=W0zgY2mBTA8)
Supplement: supplementary_material [file attachment]

## 6 Appendix

### 6.1 Noise schedulers for Local Trajectory Diffuser

We model local trajectory optimization as a discrete-time diffusion process, which we implement using the DDPM sampler [20]. DDPM uses a non-parametric time-dependent noise variance scheduler  $\beta_k$ , which defines how much noise is added at each time step. We adopt the cosine schedule of GLIDE [79] as our choice for  $\beta_k$ :

$$\beta_k = \frac{1 - \cos\left(\frac{k+1.008}{1.008} * \frac{\pi}{2}\right)^2}{\cos\left(\frac{k+0.008}{1.008} * \frac{\pi}{2}\right)^2} \quad (6)$$

By defining  $\alpha_k = 1 - \beta_k$ , and  $\bar{\alpha}_k = \prod_{i=1}^k \alpha_i$ , we can now obtain the analytical form of  $\lambda_k, \gamma_k, \sigma_k$  in Equation 1 as follows:

$$\lambda_k = \frac{1}{\sqrt{\alpha_k}} \quad (7)$$

$$\gamma_k = \frac{1 - \alpha_k}{\sqrt{1 - \bar{\alpha}_k}} \quad (8)$$

$$\sigma_k = \frac{1 - \bar{\alpha}_{k+1}}{1 - \bar{\alpha}_k} \beta_k \quad (9)$$

where  $k$  is the diffusion denoising timestep.

### 6.2 Act3D Background and Implementation Details

Act3D is a language-conditioned end-effector 6-DoF keypose predictor that learns 3D perceptual representations of arbitrary spatial resolution via recurrent coarse-to-fine 3D point sampling and featurization. Act3D featurizes multi-view RGB images with a pre-trained 2D backbone and lifts them in 3D using depth to obtain a multi-scale 3D scene feature cloud. It then iteratively predicts 3D foci of attention in the empty 3D workspace, samples 3D point grids in their vicinity, and featurizes the sampled 3D points using relative cross-attention to the physical scene feature cloud, language tokens, and proprioception. Act3D detects the 3D point that corresponds to the next best end-effector position using a detection Transformer head, and regresses the rotation, end-effector opening, and planner collision avoidance from the decoder’s parametric query.

We extract two feature maps per  $256 \times 256$  input image view:  $32 \times 32$  coarse visual tokens and  $64 \times 64$  fine visual tokens. We use three ghost point sampling stages: first across the entire workspace (roughly 1 meter cube), then in a 16 centimeter diameter ball, and finally in a 4 centimeter diameter ball. The coarsest ghost points attend to a global coarse scene feature cloud ( $32 \times 32 \times n_{\text{cam}}$  coarse visual tokens) whereas finer ghost points attend to a local fine scene feature cloud (the closest  $32 \times 32 \times n_{\text{cam}}$  out of the total  $64 \times 64 \times m_{\text{cam}}$  fine visual tokens). During training, we sample 1000 ghost points in total split equally across the three stages. At inference time, we trade-off extra performance for additional compute by sampling more ghost points than the model ever saw at training time (20,000). We use 2 layers of cross-attention and an embedding size 60 for single-task experiments and 120 for multi-task experiments. Training samples are augmented with random crops of RGB-D images and  $\pm 45.0$  yaw rotation perturbations (only in the real world as this degrades performance in simulation).

### 6.3 Simulation Setup in RLBench

The RLBench simulation environment uses a Franka Panda robotic arm on a table-top setting. We consider  $m = 4$  camera inputs: *left\_shoulder*, *right\_shoulder*, *wrist*, and *front*, as shown in Figure 3. The *wrist* camera is attached to the robot’s end-effector and moves together with the robot. The other 3 are static. To ensure a fair comparison, when comparing with PerAct, we use all 4 cameras following PerAct setting, and use the first 3 cameras when compared with other baselines.

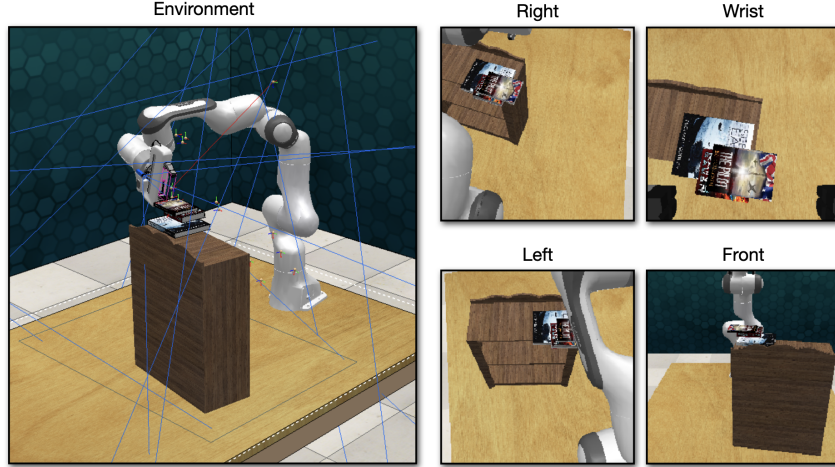

Figure 3: Simulation setup.

#### 531 6.4 Real-world Setup

532 Our real-robot setup contains a real Franka  
 533 Panda robotic arm equipped with a parallel jaw  
 534 gripper, as shown in Figure 4. We use a single  
 535 Azure Kinect sensor to provide RGB-D input  
 536 signal from the front view at 30Hz. The image  
 537 input is of resolution  $1280 \times 720$ , and we crop  
 538 and downsample it to  $256 \times 256$  before feed-  
 539 ing it to our model. We calibrate the extrinsics  
 540 of the camera with respect to the robot base us-  
 541 ing the `easy_handeye`<sup>1</sup> ROS package. Our full  
 542 model generates dense trajectories, thus we do  
 543 not use low-level motion planners. We collect  
 544 6-DoF human demonstrations by tele-operating  
 545 the robot using a SpaceMouse<sup>2</sup> at 30Hz, follow-  
 546 ing [16]. We use the same strategy for keyframe  
 547 extraction as in simulation. Our real-world  
 548 multi-task policy is trained on 4 A100 GPUs  
 549 for 3 days. Inference is done on a desktop with  
 550 a single RTX4090 GPU, running Ubuntu 20.04  
 551 and ROS Noetic. For robot control, we use the  
 552 open-source `frankapy`<sup>3</sup> package to send real-  
 553 time position-control commands to the robot.

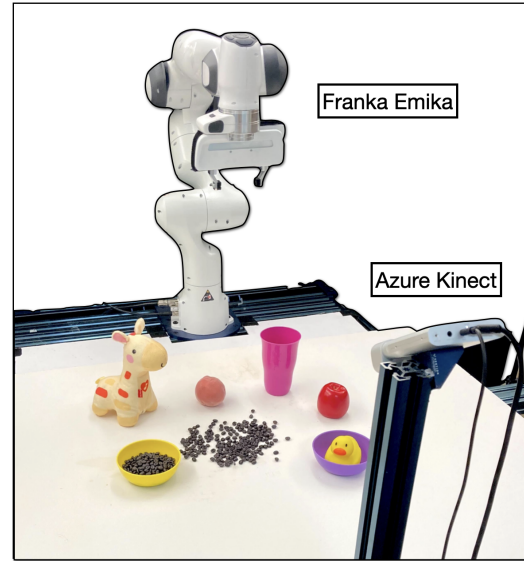

Figure 4: Real-world setup.

<sup>1</sup>[https://github.com/IFL-CAMP/easy\\_handeye](https://github.com/IFL-CAMP/easy_handeye)

<sup>2</sup><https://3dconnexion.com/us/product/spacemouse-compact/>

<sup>3</sup><https://github.com/iamlab-cmu/frankapy>
